# Supplementary material for: Solvent assisted catalytic conversion of beech wood and organosolv lignin over NiMo/γ-Al2O3
Source: Royal Society of Chemistry journal article supplement (doi:10.1039/c9se00375d), 2020-01-01
Supplement: c9se00375d1.pdf [file c9se00375d1.pdf]

## Supplementary information

### One-pot catalytic conversion of beech wood and organosolv lignin over NiMo/ $\gamma$ - $\text{Al}_2\text{O}_3$

Soheila Ghafarnejad Parto<sup>1</sup>, Emma Kathrine Jørgensen<sup>1</sup>, Jakob Munkholt Christensen<sup>1</sup>, Lars Saaby Pedersen<sup>2</sup>, Daniel Bo Larsen<sup>3</sup>, Jens Øllgaard Duus<sup>3</sup>, and Anker Degn Jensen<sup>1\*</sup>

<sup>1</sup>*Chemical Engineering, Technical University of Denmark, 2800 Kgs. Lyngby, (Denmark)*

<sup>2</sup>*Haldor Topsøe A/S, Haldor Topsøes Allé 1, 2800 Kgs. Lyngby (Denmark)*

<sup>3</sup>*Department of Chemistry, Technical University of Denmark, 2800 Kgs. Lyngby, (Denmark)*

\*[aj@kt.dtu.dk](mailto:aj@kt.dtu.dk)

## **Composition analysis of beech wood**

The composition analysis of the beech wood was outsourced to the commercial company Celignis. The procedure for determination of biomass constituents is briefly presented as follows:

The biomass is acid hydrolyzed by mixing 300 mg of the sample with 3 mL of 72% H<sub>2</sub>SO<sub>4</sub> in a pressure tube and keeping at 30 °C for 1 hour, followed by addition of 84 mL water for a second-stage-hydrolysis and heating to 121 °C in an autoclave for another 1 hour. After this specific time and cooling down to the ambient temperature, the solution is filtered. The residual solid fraction is considered as acid insoluble residue. The acid soluble lignin is determined by analysis of the filtrate with a UV-Visible transmission spectrum and based on absorbance value at 205 nm. The Klason lignin content is determined by deducing the acid insoluble ash from acid insoluble residue content. The acid insoluble ash is measured by combusting the acid insoluble residue in a ramp temperature program heated up to 575 °C (180 min). The total sugar content is calculated by summing up the glucose, xylose, mannose, arabinose, galactose and rhamnose content. The content of each sugar is determined by HPLC analysis of the hydrolysate (filtrate phase) using the representative standards as reference.

For a detailed instruction please check Celignis's website:

<https://www.celignis.com>

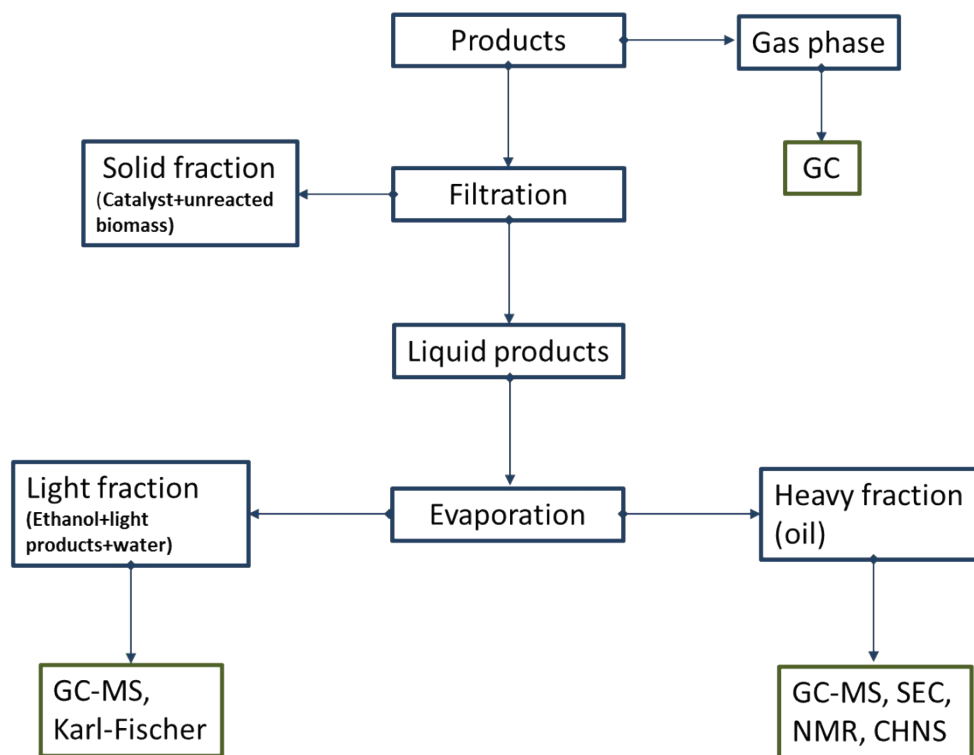

**Figure S1** Diagram of the workup procedure employed at the end of each reaction

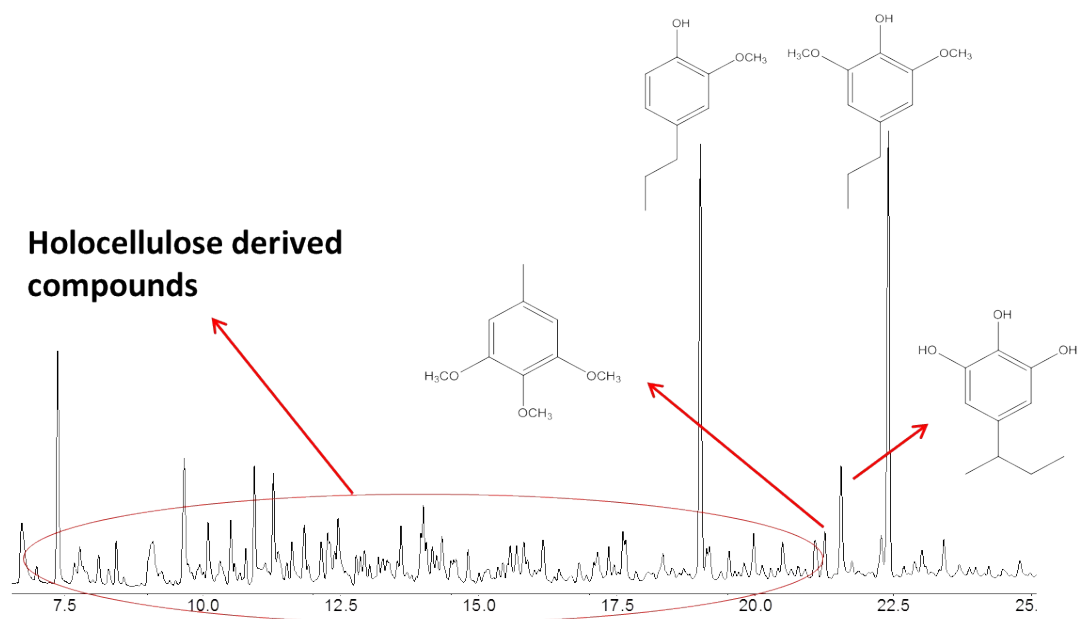

**Figure S2** GC chromatogram of the heavy fraction obtained from conversion of beech wood at 300 °C and the main identified monomers; 4-propyl guaiacol (RT:19.1), 1,2,3-trimethoxy-5-methyl benzene (RT:21.3), 5-sec-butyl-1,2,3-benzenetriol (RT:21.6), and 4-propyl syringol (RT:22.4). Reaction condition: 1 g NiMo/ $\gamma$ -Al<sub>2</sub>O<sub>3</sub> catalyst: 10 g beech wood, 100 ml ethanol, 26 bar H<sub>2</sub> (loaded at RT), 3 hours.

**Table S1** The main identified products in the light fraction from catalytic conversion of beech wood at 300 °C and the representative area percent of each compound in the light fraction. 1 g NiMo/ $\gamma$ -Al<sub>2</sub>O<sub>3</sub> catalyst: 10 g beech wood, 100 ml ethanol, 26 bar H<sub>2</sub> (loaded at RT), 3 hours.

| <b>Compound</b>                   | <b>Area %</b> | <b>Holocellulose<sup>a</sup></b> | <b>EtOH<sup>a</sup></b> |
|-----------------------------------|---------------|----------------------------------|-------------------------|
| <b>Alcohols</b>                   |               |                                  |                         |
| 1-Propanol                        | 0.20          | *                                | *                       |
| Butanol                           | 1.01          | *                                | *                       |
| Propylene glycol                  | 0.06          | *                                | *                       |
| 2,4-dimethyl 1-Heptanol           | 0.20          | *                                | *                       |
| 1-Nonanol                         | 0.06          | *                                | -                       |
| <b>Aldehydes</b>                  |               |                                  |                         |
| Acetaldehyde                      | 1.8           | *                                | *                       |
| <b>Esters</b>                     |               |                                  |                         |
| Propanoic acid ethyl ester        | 0.43          | *                                | *                       |
| Butanoic acid ethyl ester         |               | *                                | *                       |
| 2-Propanol, 1-(2-methylpropoxy)   | 0.05          | *                                | *                       |
| Pentanoic acid ethyl ester        | 0.12          | *                                | -                       |
| Acetic acid, ethoxy-, ethyl ester | 0.02          | *                                | *                       |
| <b>Ethers</b>                     |               |                                  |                         |
| Ethanol, 2-ethoxy                 | 0.09          | *                                | -                       |
| 1,1-diethoxy ethane               | 1.13          | *                                | *                       |
| 1-ethoxy, 2-propanol              | 0.04          | *                                | *                       |
| 1-ethoxy, butane                  | 0.19          | *                                | *                       |
| 2-ethoxy, pentane                 | 0.04          | *                                | *                       |
| Ethylene glycol monovinyl ether   | 0.03          | *                                | *                       |
| 4-ethoxy 1-butanol                | 0.01          | *                                | *                       |
| 2-ethoxy, butane                  | 0.03          | *                                | -                       |
| 1,1-diethoxy butane               | 0.07          | *                                | *                       |
| 1-ethoxy, 3-pentanol              | 0.02          | *                                | *                       |
| 1-(1-ethoxyethoxy), butane        | 0.03          | *                                | *                       |
| 2-Ethoxypentane                   | 0.05          | *                                | *                       |
| <b>Ketones</b>                    |               |                                  |                         |
| 2-Pentanone                       | 0.20          | *                                | -                       |
| 3-Hexanone                        | 0.10          | *                                | -                       |
| 2-Hexanone                        | 0.21          | *                                | -                       |
| 2-Methyl, cyclopentanone          | 0.18          | *                                | -                       |
| 3-Methyl, cyclopentanone          | 0.04          | *                                | -                       |
| 4-Heptanone                       | 0.05          | *                                | -                       |
| 2-Octanone                        | 0.03          | *                                | -                       |
| Cyclopentanone                    | 0.09          | *                                | -                       |
| 4-Octanone                        | 0.02          | *                                | -                       |
| <b>Furans</b>                     |               |                                  |                         |
| 2,5-Dimethylfuran                 | 0.23          | *                                | -                       |
| Furanmethanol-tetrahydro          | 0.19          | *                                | -                       |

<sup>a</sup> It is specified by \* whether the compounds were detected from conversion of holocellulose or ethanol

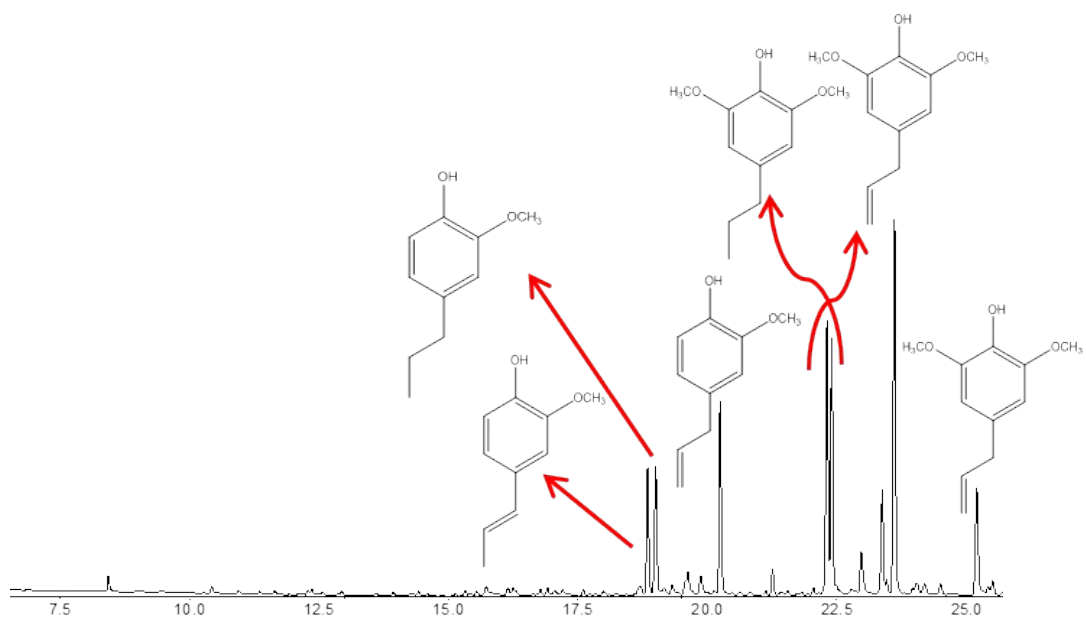

**Figure S3** GC chromatogram of the heavy fraction obtained from conversion of beech wood at 200 °C and the main identified monomers; 2-methoxy-4-(2-propenyl) phenol (RT:18.9), 4-propyl guaiacol (RT:19.1), 2-methoxy-4-propenyl phenol (RT:20.3), 2,6-dimethoxy-4-(2-propenyl) phenol (RT:22.3, 23.6 & 25.2), and 4-propyl syringol (RT:22.4). Reaction condition: 1 g NiMo/ $\gamma$ -Al<sub>2</sub>O<sub>3</sub> catalyst: 10 g beech wood, 100 ml ethanol, 26 bar H<sub>2</sub> (loaded at RT), 3 hours.

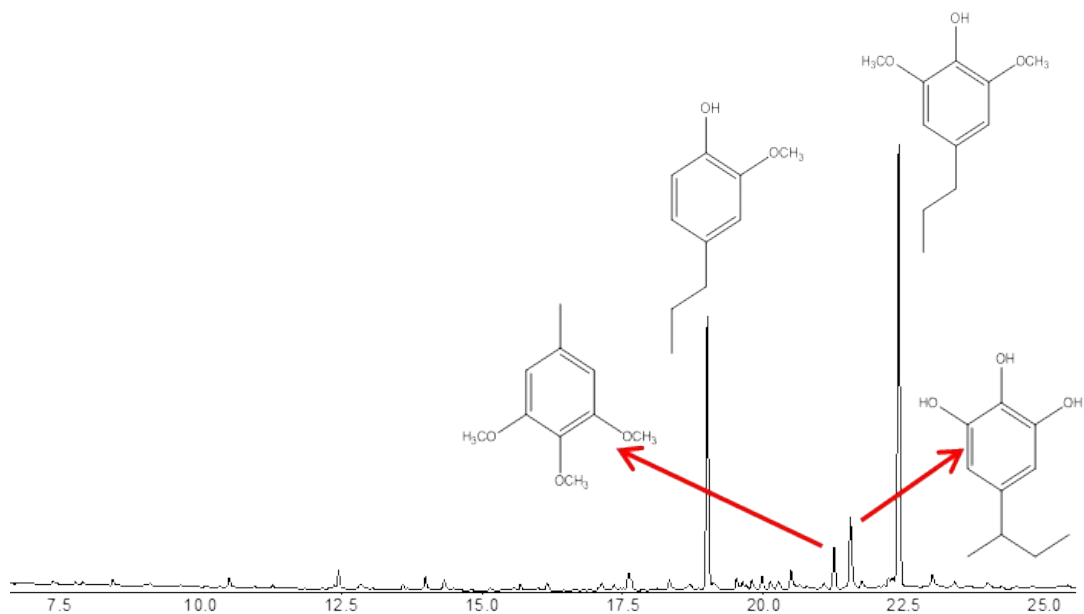

**Figure S4** GC chromatogram of the heavy fraction obtained from conversion of beech wood at 260 °C and the main identified monomers; 4-propyl guaiacol (RT:19.1), 1,2,3-trimethoxy-5-methyl benzene (RT:21.3), 5-sec-butyl-1,2,3-benzenetriol (RT:21.6), and 4-propyl syringol (RT:22.4). Reaction condition: 1 g NiMo/ $\gamma$ -Al<sub>2</sub>O<sub>3</sub> catalyst: 10 g beech wood, 100 ml ethanol, 26 bar H<sub>2</sub> (loaded at RT), 3 hours.

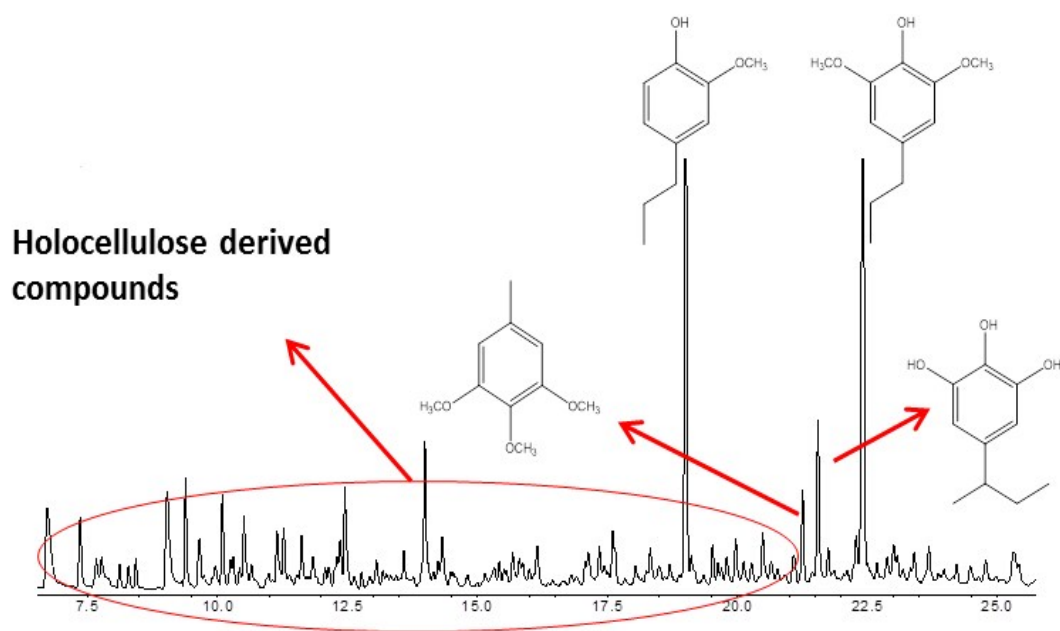

**Figure S5** GC chromatogram of the heavy fraction obtained from conversion of beech wood at 280 °C and the main identified monomers; 4-propyl guaiacol (RT:19.1), 1,2,3-trimethoxy-5-methyl benzene (RT:21.3), 5-sec-butyl-1,2,3-benzenetriol (RT:21.6), and 4-propyl syringol (RT:22.4). Reaction condition: 1 g NiMo/ $\gamma$ -Al<sub>2</sub>O<sub>3</sub> catalyst: 10 g beech wood, 100 ml ethanol, 26 bar H<sub>2</sub> (loaded at RT), 3 hours.



**Table S2** Elemental analysis, atomic O/C and H/C ratio and HHV of beech wood and the oil fractions from conversion of beech wood over sulfided NiMo/ $\gamma$ -Al<sub>2</sub>O<sub>3</sub>. Reaction condition: 1 g NiMo/ $\gamma$ -Al<sub>2</sub>O<sub>3</sub> catalyst: 10 g beech wood, 100 ml ethanol, 26 bar H<sub>2</sub> (loaded at RT), 3 hours.

| Sample        | C wt% | H wt% | N wt% | S wt% | O wt% | Atomic O/C ratio | Atomic H/C ratio | HHV (MJ/kg) |
|---------------|-------|-------|-------|-------|-------|------------------|------------------|-------------|
| Beech wood    | 53.0  | 5.8   | 0.1   | -     | 41.0  | 0.58             | 1.32             | 18.9        |
| Oil at 200 °C | 59.2  | 7.5   | 0.4   | 2.0   | 30.9  | 0.39             | 1.52             | 25.2        |
| Oil at 260 °C | 59.0  | 7.4   | 0.4   | 1.3   | 31.9  | 0.41             | 1.51             | 24.8        |
| Oil at 280 °C | 61.4  | 8.4   | 0.4   | -     | 29.8  | 0.36             | 1.64             | 27.4        |
| Oil at 300 °C | 60.9  | 8.2   | 0.3   | 1.0   | 29.6  | 0.36             | 1.61             | 26.9        |

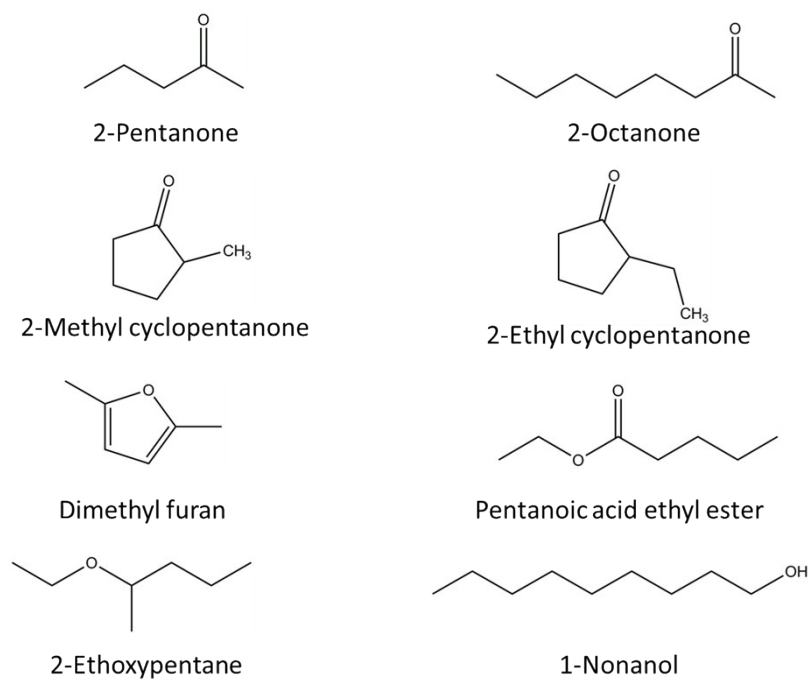

**Figure S6** Structure of sugar derived compounds from conversion of beech wood over sulfided NiMo/ $\gamma$ -Al<sub>2</sub>O<sub>3</sub> in ethanol.
